1 **Title: Multivalency enhances the specificity of Fc-cytokine fusions**

2 **Authors:** Brian Orcutt-Jahns<sup>1</sup>, Peter C. Emmel<sup>1</sup>, Eli M. Snyder<sup>1</sup>, Cori Posner<sup>2</sup>, Scott M.  
3 Carlson<sup>2</sup>, Aaron S. Meyer<sup>1,3,4,5,\*</sup>

4 **Affiliations:**

5 <sup>1</sup>Department of Bioengineering, University of California, Los Angeles, United States of America

6 <sup>2</sup>Visterra, Inc., Waltham, MA, United States of America

7 <sup>3</sup>Department of Bioinformatics, University of California, Los Angeles, United States of America

8 <sup>4</sup>Jonsson Comprehensive Cancer Center, University of California, Los Angeles, United States of America

9 <sup>5</sup>Eli and Edythe Broad Center of Regenerative Medicine and Stem Cell Research, University of  
10 California, Los Angeles, United States of America

11 \*Corresponding author. Email: [ameyer@asmlab.org](mailto:ameyer@asmlab.org)

12 **Classification:** Research report

13 **Keywords:** Cytokines, IL-2, IL-15, IL-7, Immunity, Multivalency

14 **Author Emails/Contact Information:**

15 Brian Orcutt-Jahns: [orcuttjahnsbrian@gmail.com](mailto:orcuttjahnsbrian@gmail.com)

16 Peter C. Emmel: [peterc Emmel@gmail.com](mailto:peterc Emmel@gmail.com)

17 Eli M. Snyder: [emsnyder@g.ucla.edu](mailto:emsnyder@g.ucla.edu)

18 Cori Posner: [Cori.posner@gmail.com](mailto:Cori.posner@gmail.com)

19 Scott M. Carlson: [smcarlson@gmail.com](mailto:smcarlson@gmail.com)

20 Aaron S. Meyer: [ameyer@ucla.edu](mailto:ameyer@ucla.edu)

21 **Abstract:** The common  $\gamma$ -chain receptor cytokines are promising immune therapies due to their  
22 central role in coordinating the proliferation and activity of various immune cell populations.  
23 One of these cytokines, interleukin (IL)-2, has potential as a therapy in autoimmunity but is  
24 limited in effectiveness by its modest specificity toward regulatory T cells ( $T_{reg}$ s). Therapeutic  
25 ligands are often made dimeric as antibody Fc fusions to confer desirable pharmacokinetic  
26 benefits, with under-explored consequences on signaling. Here, we systematically profiled the  
27 signaling responses to a panel of wild type and mutein IL-2 molecules in various Fc fusion  
28 configurations. We used a tensor-structured dimensionality reduction scheme to decompose the  
29 responses of each cell population to each ligand over a range of time points and cytokine  
30 concentrations. We found that dimeric muteins are uniquely specific for  $T_{reg}$ s at intermediate  
31 ligand concentrations. We then compared signaling response across all treatments to a simple,  
32 two-step multivalent binding model. Our model was able to predict cellular responses with high  
33 accuracy. Bivalent Fc fusions display enhanced specificity and potency for  $T_{reg}$ s through avidity  
34 effects toward IL-2R $\alpha$ . We then utilize our model to identify the potential benefits conferred by  
35 valency engineering as an additional mechanism for cytokines with optimized therapeutic  
36 benefits. In total, these findings represent a comprehensive analysis of how ligand properties, and  
37 their consequent effects on surface receptor-ligand interactions, translate to selective activation  
38 of immune cell populations. It also identifies a new route toward engineering even more  
39 selective therapeutic cytokines.

40 **Significance Statement:** Signaling in off-target immune cells has hindered the effectiveness of  
41 IL-2 as an immunotherapeutic. We show that bivalent IL-2 muteins exhibit more regulatory T  
42 cell-selective signaling than monovalent forms. This altered selectivity is explained by altered  
43 surface receptor-ligand binding kinetics and can be quantitatively predicted using a multivalent  
44 binding model. Finally, our model shows that even more selective IL-2 therapies may be  
45 developed by designing cytokines in higher valency formats, revealing valency as an unexplored  
46 mechanism for engineering specific IL-2 responses.

47 **Main Text:**

## 48 INTRODUCTION

49 Cytokines that bind to the common  $\gamma$ -chain ( $\gamma_c$ ) receptor, including interleukin (IL)-2, 4, 7, 9, 15,  
50 and 21, are a critical hub in modulating both innate and adaptive immune responses (1). The  
51 cytokine family operates through a common theme of binding private receptors for each ligand  
52 before engaging the common  $\gamma_c$  receptor to induce signaling. A prominent phenotypic outcome  
53 of  $\gamma_c$  receptor signaling is lymphoproliferation, and so the cytokines are often observed to be an  
54 endogenous or exogenous mechanism for altering the balance of immune cell types. This  
55 phenotype is observed most extremely from loss-of-function or reduced activity mutations in  $\gamma_c$   
56 which subvert T and NK cell maturation (2). Disruptive mutations in private receptors can lead  
57 to more selective reductions in cell types such as regulatory T cells ( $T_{reg}$ s) with IL-2R $\alpha$  or T cells  
58 with IL-7R $\alpha$  (1). Conversely, activating mutations in these receptors, such as IL-7R $\alpha$ , promote  
59 cancers such as B and T cell leukemias (3).

60 The importance of these cytokines to immune homeostasis and challenges in altering their  
61 signaling toward specific therapeutic goals have inspired a variety of engineered forms. Perhaps  
62 the most common approach has been to alter the receptor affinities of IL-2 to weaken its  
63 interaction with IL-2R $\alpha$ , IL-2R $\beta$ , or both receptors. IL-2R $\alpha$  confers  $T_{reg}$ s with greater sensitivity

64 toward IL-2, and so IL-2R $\alpha$  affinity tunes the relative amount of signaling toward regulatory  
65 versus effector populations, while IL-2R $\beta$  modulates the overall signaling potency (4). In most  
66 cases, the wild-type cytokine or mutein is fused to an IgG antibody to take advantage of FcRn-  
67 mediated recycling for extended half-life. The antibody has also been employed in a more active  
68 role by binding to IL-2 to influence its availability to each receptor in so-called  
69 immunocytokines (5). Fc fusion has taken many forms such as conjugation to the cytokine in an  
70 N-terminal or C-terminal orientation, including one or two cytokines per IgG, and including or  
71 excluding Fc effector functions (6). Notably, bivalent cytokine fusions have been shown to be  
72 more potent in T<sub>reg</sub>-targeted engineered therapies, perhaps through pharmacokinetic or other  
73 means (7). The potential design space for these molecules quickly becomes experimentally  
74 intractable without consistent design principles.

75 To address this challenge, here we systematically evaluate the signaling specificity effects of  
76 engineered cytokine alterations, including affinity-altering mutations and Fc-fusion formats. We  
77 explore three hypotheses for the observed effect of bivalency in Fc-cytokine fusions. We find  
78 that the effect of bivalency can be fully explained by altered binding selectivity toward cell based  
79 on their abundances. The signaling specificity of all muteins and Fc-formats match well with a  
80 multivalent binding model, both between cell types and across cell-to-cell variation within a cell  
81 type. We propose that cytokine valency is an unexplored axis for further enhancing selective  
82 signaling responses and that many opportunities for using multivalency engineering exist within  
83 the  $\gamma_c$  cytokine family.

## 84 RESULTS

### 85 Multiple potential mechanisms of bivalency effects

86 Bivalent  $\gamma_c$  cytokines have been shown to display altered potency and cell-type-selective  
87 signaling profiles, both *in vitro* and *in vivo* (8). This alteration has led to both increases and  
88 reductions in the mutein's propensity for immune suppression; these variable outcomes may  
89 occur due to the differing affinities of the IL-2 mutein employed in the Fc fusions (7, 8). The  
90 mechanism by which multivalency induces altered signaling compared to monovalent ligands in  
91 the  $\gamma_c$  signaling pathways has not been systematically explored. The possible origins of the  
92 differences between monovalent and bivalent cytokine signaling profiles are varied, and each  
93 would influence the use of this alteration toward therapeutic ends.

94 As a first possibility, multivalent  $\gamma_c$  ligands may induce signaling through altered surface-  
95 receptor interactions (Fig. 1a). While monovalent ligands can only bind and ultimately transduce  
96 signal through a single receptor complex, multivalent ligands can potentially engage two or more  
97 complexes simultaneously. This change in signaling activity ultimately leads to an altered  
98 functional affinity, referred to as avidity. Among other effects, avidity leads to varied binding  
99 depending on the abundance of target receptors (9). In fact, this has been used with IL-2 to  
100 deliver cytotoxic cargo more selectively to T<sub>regS</sub> (10).

101 A second possible effect of multivalency is assembly of fundamentally distinct signaling  
102 complexes (Fig. 1b). Multivalent ligands, by binding multiple receptor complexes, can increase  
103 local receptor concentration leading to increases in downstream signal transduction (11).  
104 Clustering multiple IL-2R $\beta$ / $\gamma_c$ /IL-2 complexes may also help promote more potent or distinct  
105 forms of signaling compared to a single complex achievable with monovalent IL-2. Composition

106 of the active receptor complex is critical to the types of signaling responses observed,  
107 exemplified by the distinct signaling of “synthekines” that activate combinations of cytokine  
108 receptors (12).

109 Finally, multivalent ligands may have distinct responses due to pharmacokinetic (PK) or cell  
110 trafficking changes (Fig. 1c). IL-2 is rapidly cleared primarily through receptor-mediated  
111 endocytosis after Fc fusion, meaning that PK is closely tied to its activity (13). Nanoparticles and  
112 ligands of higher valency are endocytosed through altered mechanisms, ultimately leading to  
113 changes in intracellular degradation rates (14). The PK and *in vivo* half-lives of  $\gamma_c$  cytokines are  
114 also modulated by their valency, with effects, in turn, on PK (8). Changes in PK are especially  
115 important to selective expansion of  $T_{reg}$ s as this seems to be promoted most prominently by  
116 sustained signaling, over transient boluses of IL-2 (15). Overall, bivalency can have a multitude  
117 effects on the use of IL-2 therapeutically, in what experimental systems it will be observed, and  
118 how it might be further exploited, depending upon the mechanism of its effects.

### 119 **Bivalent Fc-cytokine fusions have distinct cell specificity but shared dynamics**

120 To explore the determinants of IL-2 response in a systematic manner, we stimulated peripheral  
121 blood mononuclear cells (PBMCs) collected from a single donor with 13 IL-2 muteins with  
122 varying receptor affinities in both monomeric and dimeric Fc-fusion formats (Table S1).  
123 Stimulated cells were collected at four time points using 12 treatment concentrations. The  
124 PBMCs were then stained for canonical cell type markers and pSTAT5, a read-out of signaling  
125 response, allowing us to separate response by cell type. Four different cell types ( $T_{reg}$ ,  $T_{helper}$ ,  
126 CD8+, NK) were gated and quantified (Fig. S1a-d).  $T_{reg}$ s, and  $T_{helper}$ s were further dissected  
127 according to their IL-2R $\alpha$  abundances into low, average, and high expression subpopulations by  
128 isolating sub-populations using three evenly logarithmically spaced bins (Fig. S1j).

129 Exploring how dynamic responses vary across responding cell types and ligand treatments is  
130 challenging due to the multi-dimensional space of potential origins of variations. Restricting  
131 ones’ view to a single time point, cell type, or ligand concentration provides only a slice of the  
132 picture (6, 16). To provide a more comprehensive view of response, we organized our profiling  
133 experiments into a four-dimensional tensor, wherein the position along each dimension  
134 represented the ligand used, concentration, treatment duration, or cell type in the profiling. We  
135 then factored this data using non-negative canonical polyadic (CP) decomposition to derive  
136 factors summarizing the influence of each dimension (Fig. 2a). Three components explained  
137 roughly 90% of the variance within the dataset (Fig. 2b).

138 Factorization separated distinct response profiles into separate components, and the effect of  
139 each dimension into separate factors. For instance, component 1 almost exclusively represented  
140 responses to wild-type cytokines (Fig. 2c), which were the only ligands which were not Fc-  
141 conjugated, showing a response primarily at high concentrations (Fig. 2d), with broad specificity  
142 (Fig. 2e) and a signaling profile that peaks at 30 minutes and then more rapidly decreases (Fig.  
143 2f). An alternative way to interpret the factorization results is to compare profiles within a single  
144 dimension. For example, component 1 led to a less sustained profile of signaling response as  
145 compared to the other signaling patterns (Fig. 2f).

146 Remarkably, components 2 and 3 cleanly separated ligands conjugated in bivalent or monovalent  
147 forms respectively (Fig. 2c). In fact, ligand valency was represented more prominently than

148 differences in receptor affinity between muteins. Component 2 had uniquely high  $T_{reg}$  specificity  
149 (Fig. 2e) and was most represented at intermediate concentrations (Fig. 2d). Component 2 was  
150 also highly correlated with IL-2R $\alpha$  abundance in subsets of  $T_{reg}$  and  $T_{helper}$  cells, suggesting that  
151 bivalent molecule's specificity for  $T_{reg}$ s is mediated by their higher abundance of IL-2R $\alpha$ .  
152 Component 3 had a broad cell response (Fig. 2e) and increased monotonically with concentration  
153 (Fig. 2d). Despite these strong differences in specificities both components had nearly identical  
154 time dynamics (Fig. 2f). In total, these results indicated ligand valency as a critical determinant  
155 of IL-2 specificity, and that while Fc fusion subtly affected the specificity of response,  
156 monovalent and bivalent ligands had identical dynamics.

### 157 **Differences among IL-2 responses are explained by a simple multivalent binding model**

158 With the indication that  $T_{reg}$  specificity is enhanced by multivalency without changes to signaling  
159 dynamics, we sought to evaluate how well cell surface binding on its own could predict  
160 response. We employed a two-step, equilibrium, multivalent binding model to predict cellular  
161 response to IL-2 muteins by assuming that signaling response was proportional to the amount of  
162 active receptor-ligand complexes (17). See methods for specifics about how binding predictions  
163 were used to predict pSTAT5 response. We fit this model to our signaling profiling experiments  
164 and evaluated its concordance with the data. The only non-scaling fitting parameter,  $K_x^*$ , had an  
165 optimum at  $1.2 \times 10^{-11}$  #/cell, consistent with that seen for other receptor families (18–20).  
166 Overall, we observed remarkable consistency between predicted and observed response ( $R^2 =$   
167 0.85; Fig. 3b). This high accuracy was maintained within subsets of the data including individual  
168 cell types and ligands (Fig. 3c–d). To verify our model's predictions were dependent on the  
169 valency of the molecule, we again fit the model enforcing that all ligands were monovalent. This  
170 significantly reduced model accuracy for many of the bivalent ligands (Fig. 3e), confirming that  
171 multivalent binding was critical in modeling signaling response.

172 To ensure that our model was not simply capturing a trend towards higher signaling with  
173 increasing concentration, we examined our model's accuracy within specific cytokine  
174 concentrations (Fig. 3f). Our model was unable to predict response at the lowest concentrations  
175 as these did not stimulate signaling and were dominated by experimental noise but increased in  
176 accuracy at concentrations where any signaling response was observed. Finally, we examined  
177 how our model's accuracy varied with time by fitting the model to each time point individually.  
178 As expected, given that longer treatments likely involve various compensatory signaling such as  
179 the degradation or increased transcription of IL-2 receptor subunits (21, 22), we most accurately  
180 predicted initial responses (30 mins) with a slight decrease in accuracy over longer timescales  
181 (Fig. 3g). In total, multivalent cell surface binding showed quantitative agreement with the  
182 pattern of cell-type-specific responses to IL-2 muteins, supporting that the specificity  
183 enhancement of bivalency is derived from cell surface binding avidity effects.

### 184 **Multivalency provides a general strategy for further enhanced signaling selectivity**

185 Given that a simple binding model accurately predicted cell-type-specific responses to IL-2 and  
186 that bivalent, Fc-fused IL-2 muteins have favorable specificity properties, we sought to  
187 computationally explore to what extent multivalency might be a generally useful strategy. While  
188 monovalent ligand binding scales linearly with receptor abundance, multivalent ligands bind  
189 nonlinearly depending upon receptor abundance (23). Thus, multivalent ligands should be able to  
190 selectively target cells with uniquely high expression of certain  $\gamma_c$  family receptors.



191 Valency enhancements are only apparent with coordinated changes in receptor-ligand binding  
192 affinities (24). Therefore, we optimized the receptor affinities of simulated ligands while varying  
193 valency. We first designed IL-2 muteins of varying valency to obtain optimal  $T_{reg}$  specificity  
194 (Fig. 4a). As expected, ligand valency increased achievable selectivity past what was achievable  
195 using the monovalent cytokine format at any receptor affinity. Higher valency required reduced  
196 IL-2R $\alpha$  affinities (Fig. 4b).

197 We then explored whether IL-2 muteins lacking IL-2R $\alpha$  binding could selectively target NK  
198 cells, based on their uniquely high expression of IL-2R $\beta$ , with similar results; IL-2 muteins of  
199 higher valency were predicted to be increasingly selective for activation of NK cells, so long as  
200 IL-2R $\beta$ / $\gamma_c$  affinity was coordinately decreased (Fig. 4c,d). Finally, we sought to explore  $T_{helper}$ -  
201 selective muteins of IL-7, as they express high amounts of IL-7R $\alpha$  (Fig. S1i). We again found  
202 that ligands of higher valency should achieve higher degrees of selectivity for these cells, but that  
203 the benefits of valency were less than the targeting of  $T_{reg}$ s or NK cells using IL-2 mutants  
204 because CD8+ T cells have similar IL-7R $\alpha$  amounts (Fig. 4e). These benefits were again found  
205 to be contingent on decreasing affinity of the IL-7 muteins for IL-7R $\alpha$  at higher valency (Fig.  
206 4f). In total, these results show that valency has unexplored potential for designing cytokines  
207 with enhanced therapeutic efficacy and reduced toxicity. They also show the potential benefit of  
208 the modeling framework described above in guiding therapeutic development.

## 209 DISCUSSION

210 Here, we have systematically explored how ligand properties determine signaling response  
211 across 13 ligands including wild-type IL-2, and both monovalent and bivalent Fc fusion IL-2  
212 variants. A tensor-based dimensionality reduction technique identified the patterns of changing  
213 response with ligand properties, revealing that multivalent cytokines have unique specificity but  
214 identical dynamics (Fig. 2). The mechanism responsible for this unique specificity was then  
215 explored using a multivalent binding model, which able to reproduce cell-type-specific responses  
216 to IL-2 muteins with high accuracy, indicating that specificity is derived from surface binding  
217 avidity effects (Fig. 3). Through this model, we found that cytokines of higher valency offer even  
218 greater cell type selectivity given corresponding affinity adjustments, which should translate to  
219 therapies of improved potency and reduced toxicity (Fig. 4).

220 The design of cell-type-selective ligands is complicated by the complex signaling processes by  
221 which they induce cellular signaling and ultimately response, which leads to a combinatorial  
222 explosion of potential ligand design objectives (25). This work serves to demonstrate the  
223 importance of the relatively unexplored axis of ligand development represented by the design of  
224 multivalent ligands. Multivalent ligands have several documented effects, including altered  
225 signal transduction (11, 26), binding avidity, and pharmacokinetics (27) or intracellular  
226 trafficking (28). While valency has been extensively explored as a means to introduce binding  
227 selectivity based on receptor density (9, 29), how this effect interacts with the presence of  
228 multiple receptor species and cell signaling is surely more complex. The ability of the binding  
229 model described in this work to accurately predict immune cell-type-specific response indicates  
230 that the cell-type-specific signaling profiles of these cytokines can still be understood as  
231 principally arising through receptor avidity effects at the cell surface (Fig. 3).

232 Our work here may be used to guide the design of IL-2 muteins with high selectivity for  $T_{reg}$ s, an  
233 important criterion in the design of IL-2 based treatments for autoimmune diseases (30, 31). By

234 optimizing the predicted selectivity of high-valency ligands, we showed that multivalency may  
235 be exploited to design more effective IL-2 based therapeutics for use in the clinical setting,  
236 where IL-2 based therapies have traditionally struggled (Fig. 4a,b) (32). Combined with the  
237 superior *in vivo* half-life conferred by Fc-conjugated IL-2 muteins, these multivalent therapeutics  
238 could potentially be used in an out-patient setting and require less frequent dosing (33).  
239 Furthermore, the superior selectivity offered by engineered multivalent ligands will likely further  
240 increase their *in vivo* half-lives, due to a reduction in receptor-mediated clearance by off-target  
241 populations. We also demonstrated the potential benefit which multivalency may confer in the  
242 selective activation of NK cells, which could lead to similarly improved anti-cancer treatments  
243 (34). Our approach here may also be applied to engineer selectivity into other signaling pathways  
244 characterized by cell type pleiotropy, such as IL-4/IL-13 or TNF systems (35, 36).

245 While our approach does effectively capture cell type specific responses to IL-2 and IL-2  
246 muteins and can be readily applied to other well-studied signaling families, several challenges in  
247 its implementation and broad translation to therapeutic development remain. Our model can be  
248 used to generate guidelines for the modulation of receptor-ligand interactions in conjunction with  
249 valency engineering to design more selective ligands, but also predicts that there are specific  
250 receptor affinities required to achieve these benefits (Fig. 4). While a host of methods have been  
251 developed and employed to enhance or ablate cytokine affinity for receptor subunits (37),  
252 precisely tuning ligand affinities remains a complicated protein engineering challenge.  
253 Furthermore, we have not yet experimentally validated whether the advantages conferred by  
254 higher valency ligands *in vitro* translate to *in vivo* settings. For example, a research group found  
255 that while a bivalent IL-2 molecule conjugated to a diphtheria-based toxin showed an enhanced  
256 ability to target and eliminate  $T_{reg}$ s in an *in vitro* setting (38), its enhanced selectivity failed to be  
257 replicated in *in vivo* trials and did not eliminate  $T_{reg}$ s any more selectively than its monovalent  
258 counterpart (39). However, the increased efficacy and reduced toxicity of a bivalent EGFR-based  
259 therapy over its monovalent counterpart in an *in vivo* setting was demonstrated by the same  
260 group, suggesting that the specificity conferred by multivalent ligands can indeed transfer to  
261 clinical settings (40). This discrepancy between *in vivo* and *in vitro* selectivity indicates that  
262 further experimental modeling is undoubtedly necessary to explore the *in vivo* benefits of  
263 multivalent IL-2 therapies.

## 264 MATERIALS AND METHODS

### 265 Modeling

#### 266 Binding model

267 Model was formulated as described in Tan *et al* (24). The monomer composition of a ligand  
268 complex was represented by a vector  $\boldsymbol{\theta} = (\theta_1, \theta_2, \dots, \theta_{N_L})$ , where each  $\theta_i$  was the number of  
269 monomer ligand type  $i$  on that complex. Let  $C_{\boldsymbol{\theta}}$  be the proportion of the  $\boldsymbol{\theta}$  complexes in all  
270 ligand complexes, and  $\theta$  be the set of all possible  $\boldsymbol{\theta}$ 's. We have  $\sum_{\boldsymbol{\theta} \in \theta} C_{\boldsymbol{\theta}} = 1$ .

271 The binding between a ligand complex and a cell expressing several types of receptors can be  
272 represented by a series of  $q_{ij}$ . The relationship between  $q_{ij}$ 's and  $\theta_i$  is given by  $\theta_i = q_{i0} +$   
273  $q_{i1} + \dots + q_{iN_R}$ . Let the vector  $\mathbf{q}_i = (q_{i0}, q_{i1}, \dots, q_{iN_R})$ , and the corresponding  $\boldsymbol{\theta}$  of a binding  
274 configuration  $\mathbf{q}$  be  $\boldsymbol{\theta}(\mathbf{q})$ . For all  $i$  in  $\{1, 2, \dots, N_L\}$ , we define  $\psi_{ij} = R_{eq,j} K_{a,ij} K_x^*$  where  $j =$

275  $\{1, 2, \dots, N_R\}$  and  $\psi_{i0} = 1$ . The relative number of complexes bound to a cell with configuration  
276  $\mathbf{q}$  at equilibrium is

$$277 \quad v_{\mathbf{q},eq} = \frac{L_0 C_{\theta}(\mathbf{q})}{K_x^*} \prod_{i=1}^{N_L} \prod_{j=0}^{N_R} \psi_{ij}^{q_{ij}} \prod_{i=1}^{N_L} \binom{\theta_i}{q_i}.$$

278 Then we can calculate the relative amount of bound receptor  $n$  as

$$279 \quad R_{\text{bound},n} = \frac{L_0}{K_x^*} \sum_{\theta \in \Theta} C_{\theta} \left[ \sum_{i=1}^{N_L} \frac{\psi_{in} \theta_i}{\sum_{j=0}^{N_R} \psi_{ij}} \right] \prod_{i=1}^{N_L} \left( \sum_{j=0}^{N_R} \psi_{ij} \right)^{\theta_i}.$$

280 By  $R_{\text{tot},n} = R_{\text{eq},n} + R_{\text{bound},n}$ , we can solve  $R_{\text{eq},n}$  numerically for each type of receptor.

## 281 Application of multivalent binding model to IL-2 signaling pathway

282 Each IL-2 molecule was allowed to bind to one free IL-2R $\alpha$  and one IL-2R $\beta/\gamma_c$  receptor. Initial  
283 IL-2-receptor association proceeds with the known kinetics of monomeric ligand-receptor  
284 interaction (Table S1). Subsequent ligand-receptor binding interactions then proceed with an  
285 association constant proportional to available receptor abundance and affinity multiplied by the  
286 scaling constant,  $K_x^*$ , as described above. To predict pSTAT5 response to IL-2 stimulation, we  
287 assumed that pSTAT5 is proportional to the amount of IL-2-bound IL-2R $\beta/\gamma_c$ , as complexes  
288 which contain these species actively signal through the JAK/STAT pathway. Scaling factors  
289 converting from predicted active signaling species to pSTAT5 abundance were fit to  
290 experimental data on a per-experiment and cell type basis. A single  $K_x^*$  value was fit for all  
291 experiments and cell types.

## 292 Tensor Factorization

293 Before decomposition, the signaling response data was background subtracted and variance  
294 scaled across each cell population. Tensor decomposition was performed using the Python  
295 package TensorLy (41), using non-negative canonical polyadic decomposition.

## 296 Experimental Methods

297 All experimental methods were performed as described in Farhat *et al.* (42)

## 298 Receptor abundance quantitation

299 Cryopreserved PBMCs (ATCC, PCS-800-011, lot#81115172) were thawed to room temperature  
300 and slowly diluted with 9 mL pre-warmed RPMI-1640 medium (Gibco, 11875-093)  
301 supplemented with 10% fetal bovine serum (FBS, Seradigm, 1500-500, lot#322B15). Media was  
302 removed, and cells washed once more with 10 mL warm RPMI-1640 + 10% FBS. Cells were  
303 brought to  $1.5 \times 10^6$  cells/mL, distributed at 250,000 cells per well in a 96-well V-bottom plate,  
304 and allowed to recover 2 hrs at 37°C in an incubator at 5% CO<sub>2</sub>. Cells were then washed twice  
305 with PBS + 0.1% BSA (PBSA, Gibco, 15260-037, Lot#2000843) and suspended in 50  $\mu$ L PBSA  
306 + 10% FBS for 10 min on ice to reduce background binding to IgG.



307 Antibodies were diluted in PBSA + 10% FBS and cells were stained for 1 hr at 4°C in darkness  
308 with a gating panel (Panel 1, Panel 2, Panel 3, or Panel 4) and one anti-receptor antibody, or an  
309 equal concentration of matched isotype/fluorochrome control antibody. Stain for CD25 was  
310 included in Panel 1 when CD122, CD132, CD127, or CD215 was being measured (CD25 is used  
311 to separate T<sub>reg</sub>s from other CD4<sup>+</sup> T cells).

312 Compensation beads (Simply Cellular Compensation Standard, Bangs Labs, 550, lot#12970) and  
313 quantitation standards (Quantum Simply Cellular anti-Mouse IgG or anti-Rat IgG, Bangs Labs,  
314 815, Lot#13895, 817, Lot#13294) were prepared for compensation and standard curve. One well  
315 was prepared for each fluorophore with 2 μL antibody in 50 μL PBSA and the corresponding  
316 beads. Bead standards were incubated for 1 hr at room temperature in the dark.

317 Both beads and cells were washed twice with PBSA. Cells were suspended in 120 μL per well  
318 PBSA, and beads to 50 μL, and analyzed using an IntelliCyt iQue Screener PLUS with VBR  
319 configuration (Sartorius) with a sip time of 35 and 30 secs for cells and beads, respectively.  
320 Antibody number was calculated from fluorescence intensity by subtracting isotype control  
321 values from matched receptor stains and calibrated using the two lowest binding quantitation  
322 standards. T<sub>reg</sub> cells could not be gated in the absence of CD25, so CD4<sup>+</sup> T cells were used as the  
323 isotype control to measure CD25 in T<sub>reg</sub> populations. Cells were gated as shown in Fig. S1.  
324 Measurements were performed using four independent staining procedures over two days.  
325 Separately, the analysis was performed with anti-receptor antibodies at 3x normal concentration  
326 to verify that receptor binding was saturated. Replicates were summarized by geometric mean.

### 327 **pSTAT5 Measurement of IL-2 and -15 Signaling in PBMCs**

328 Human PBMCs were thawed, distributed across a 96-well plate, and allowed to recover as  
329 described above. IL-2 (R&D Systems, 202-IL-010) or IL-15 (R&D Systems, 247-ILB-025) were  
330 diluted in RPMI-1640 without FBS and added to the indicated concentrations. To measure  
331 pSTAT5, media was removed, and cells fixed in 100 μL of 10% formalin (Fisher Scientific,  
332 SF100-4) for 15 mins at room temperature. Formalin was removed, cells were placed on ice, and  
333 cells were gently suspended in 50 μL of cold methanol (-30°C). Cells were stored overnight at -  
334 30°C. Cells were then washed twice with PBSA, split into two identical plates, and stained 1 hr  
335 at room temperature in darkness using antibody panels 4 and 5 with 50 μL per well. Cells were  
336 suspended in 100 μL PBSA per well, and beads to 50 μL, and analyzed on an IntelliCyt iQue  
337 Screener PLUS with VBR configuration (Sartorius) using a sip time of 35 seconds and beads 30  
338 seconds. Compensation was performed as above. Populations were gated as shown in Fig. S1,  
339 and the median pSTAT5 level extracted for each population in each well.

### 340 **Recombinant proteins**

341 IL-2/Fc fusion proteins were expressed using the Expi293 expression system according to  
342 manufacturer instructions (Thermo Scientific). Proteins were as human IgG1 Fc fused at the N-  
343 or C-terminus to human IL-2 through a (G4S)<sub>4</sub> linker. C-terminal fusions omitted the C-terminal  
344 lysine residue of human IgG1. The AviTag sequence GLNDIFEAQKIEWHE was included on  
345 whichever terminus did not contain IL-2. Fc mutations to prevent dimerization were introduced  
346 into the Fc sequence (43). Proteins were purified using MabSelect resin (GE Healthcare).  
347 Proteins were biotinylated using BirA enzyme (BPS Biosciences) according to manufacturer  
348 instructions, and extensively buffer-exchanged into phosphate buffered saline (PBS) using

349 Amicon 10 kDa spin concentrators (EMD Millipore). The sequence of IL-2R $\beta/\gamma$  Fc heterodimer  
350 was based on a reported active heterodimeric molecule (patent application US20150218260A1),  
351 with the addition of (G4S)<sub>2</sub> linker between the Fc and each receptor ectodomain. The protein  
352 was expressed in the Expi293 system and purified on MabSelect resin as above. IL2-R $\alpha$   
353 ectodomain was produced with C-terminal 6xHis tag and purified on Nickel-NTA spin columns  
354 (Qiagen) according to manufacturer instructions.

### 355 **Octet binding assays**

356 Binding affinity was measured on an Octet RED384 (ForteBio). Briefly, biotinylated monomeric  
357 IL-2/Fc fusion proteins were uniformly loaded to Streptavidin biosensors (ForteBio) at roughly  
358 10% of saturation point and equilibrated for 10 minutes in PBS + 0.1% bovine serum albumin  
359 (BSA). Association time was up to 40 minutes in IL-2R $\beta/\gamma$  titrated in 2x steps from 400 nM to  
360 6.25 nM, or IL-2R $\alpha$  from 25 nM to 20 pM, followed by dissociation in PBS + 0.1% BSA. A  
361 zero-concentration control sensor was included in each measurement and used as a reference  
362 signal. Assays were performed in quadruplicate across two days. Binding to IL-2R $\alpha$  did not fit to  
363 a simple binding model so equilibrium binding was used to determine the K<sub>D</sub> within each assay.  
364 Binding to IL-2R $\beta/\gamma$  fit a 1:1 binding model so on-rate (k<sub>on</sub>), off-rate (k<sub>off</sub>) and K<sub>D</sub> were  
365 determined by fitting to the entire binding curve. Kinetic parameters and K<sub>D</sub> were calculated for  
366 each assay by averaging all concentrations with detectable binding signal (typically 12.5 nM and  
367 above).

### 368 **Statistical analysis**

369 The number of replicates performed for each experimental measurement, and the values of  
370 confidence intervals are described in corresponding figure captions. N is used to describe the  
371 number of times a particular experiment was performed. All flow cytometry experiments  
372 performed on hPBMCs were conducted using separate experimental replicates on cells gathered  
373 from a single donor. To quantify population-level flow cytometry measurements for both  
374 signaling and receptor quantitation experiments, the mean fluorescent intensity (MFI) of a gated  
375 population was measured. Compensation to removed fluorescent spectral overlap was performed  
376 for each experimental measurement. Subtraction of either negative controls or cells treated with  
377 isotype antibodies was performed on signaling and receptor quantitation data respectively to  
378 remove background signal. Cells which were measured to display fluorescent intensities above  
379 1,000,000 were excluded from analysis during signaling experiments. Pearson correlation  
380 coefficients (R<sup>2</sup>) values were used to describe model accuracy when predicting signaling  
381 response to IL-2 and IL-2 muteins. The K<sub>x</sub><sup>\*</sup> parameter was fit using least-squares fitting and the  
382 Broyden–Fletcher–Goldfarb–Shanno minimization algorithm as implemented in SciPy.

### 383 **References**

- 384 1. W. J. Leonard, J.-X. Lin, J. J. O'Shea, The  $\gamma$ c Family of Cytokines: Basic Biology to  
385 Therapeutic Ramifications, *Immunity* **50**, 832–850 (2019).
- 386 2. M. Noguchi, H. Yi, H. M. Rosenblatt, A. H. Filipovich, S. Adelstein, W. S. Modi, O. W.  
387 McBride, W. J. Leonard, Interleukin-2 receptor gamma chain mutation results in X-linked severe  
388 combined immunodeficiency in humans., *Cell* **73**, 147–57 (1993).

- 389 3. P. P. Zenatti, D. Ribeiro, W. Li, L. Zuurbier, M. C. Silva, M. Paganin, J. Tritapoe, J. A. Hixon,  
390 A. B. Silveira, B. A. Cardoso, L. M. Sarmiento, N. Correia, M. L. Toribio, J. Kobarg, M.  
391 Horstmann, R. Pieters, S. R. Brandalise, A. A. Ferrando, J. P. Meijerink, S. K. Durum, J. A.  
392 Yunes, J. T. Barata, Oncogenic IL7R gain-of-function mutations in childhood T-cell acute  
393 lymphoblastic leukemia, *Nature Genetics* **43**, 932–939 (2011).
- 394 4. S. Mitra, A. M. Ring, S. Amarnath, J. B. Spangler, P. Li, W. Ju, S. Fischer, J. Oh, R. Spolski,  
395 K. Weiskopf, H. Kohrt, J. E. Foley, S. Rajagopalan, E. O. Long, D. H. Fowler, T. A. Waldmann,  
396 K. C. Garcia, W. J. Leonard, Interleukin-2 activity can be fine-tuned with engineered receptor  
397 signaling clamps., *Immunity* **42**, 826–38 (2015).
- 398 5. J. B. Spangler, J. Tomala, V. C. Luca, K. M. Jude, S. Dong, A. M. Ring, P. Votavova, M.  
399 Pepper, M. Kovar, K. C. Garcia, Antibodies to Interleukin-2 Elicit Selective T Cell Subset  
400 Potentiation through Distinct Conformational Mechanisms., *Immunity* **42**, 815–25 (2015).
- 401 6. A. M. Farhat, A. C. Weiner, C. Posner, Z. S. Kim, B. Orcutt-Jahns, S. M. Carlson, A. S.  
402 Meyer, Modeling Cell-Specific Dynamics and Regulation of the Common Gamma Chain  
403 Cytokines, *Cold Spring Harbor Laboratory* (2020), doi:10.1101/778894.
- 404 7. L. Khoryati, M. N. Pham, M. Sherve, S. Kumari, K. Cook, J. Pearson, M. Bogdani, D. J.  
405 Campbell, M. A. Gavin, An IL-2 mutein engineered to promote expansion of regulatory T cells  
406 arrests ongoing autoimmunity in mice, *Science Immunology* **5**, eaba5264 (2020).
- 407 8. C. J. M. Bell, Y. Sun, U. M. Nowak, J. Clark, S. Howlett, M. L. Pekalski, X. Yang, O. Ast, I.  
408 Waldhauer, A. Freimoser-Grundschober, E. Moessner, P. Umama, C. Klein, R. J. Hosse, L. S.  
409 Wicker, L. B. Peterson, Sustained in vivo signaling by long-lived IL-2 induces prolonged  
410 increases of regulatory T cells., *J Autoimmun* **56**, 66–80 (2014).
- 411 9. C. M. Csizmar, J. R. Petersburg, T. J. Perry, L. Rozumalski, B. J. Hackel, C. R. Wagner,  
412 Multivalent Ligand Binding to Cell Membrane Antigens: Defining the Interplay of Affinity,  
413 Valency, and Expression Density., *J Am Chem Soc* **141**, 251–261 (2018).
- 414 10. J. S. Peraino, H. Zhang, P. V. Rajasekera, M. Wei, J. C. Madsen, D. H. Sachs, C. A. Huang,  
415 Z. Wang, Diphtheria toxin-based bivalent human IL-2 fusion toxin with improved efficacy for  
416 targeting human CD25(+) cells., *J Immunol Methods* **405**, 57–66 (2014).
- 417 11. L. L. Kiessling, J. E. Gestwicki, L. E. Strong, Synthetic Multivalent Ligands as Probes of  
418 Signal Transduction, *Angewandte Chemie International Edition* **45**, 2348–2368 (2006).
- 419 12. I. Moraga, J. B. Spangler, J. L. Mendoza, M. Gakovic, T. S. Wehrman, P. Krutzik, K. C.  
420 Garcia, Synthekines are surrogate cytokine and growth factor agonists that compel signaling  
421 through non-natural receptor dimers, *eLife* **6**, e22882 (2017).
- 422 13. S. Gillies, Y. Lan, B. Brunkhorst, W.-K. Wong, Y. Li, K.-M. Lo, Bi-functional cytokine  
423 fusion proteins for gene therapy and antibody-targeted treatment of cancer, *Cancer Immunology,*  
424 *Immunotherapy* **51**, 449–460 (2002).

- 425 14. S. J. York, L. S. Arneson, W. T. Gregory, N. M. Dahms, S. Kornfeld, The rate of  
426 internalization of the mannose 6-phosphate/insulin-like growth factor II receptor is enhanced by  
427 multivalent ligand binding., *J Biol Chem* **274**, 1164–71 (1999).
- 428 15. R. Varma, K. Liu, K. Avery, R. Rashid, S. Schubert, I. Leung, C. Bonzon, L. Bogaert, J.  
429 Desjarlais, M. J. Bennett, Regulatory T Cell Selective IL-2-Fc Fusion Proteins for the Treatment  
430 of Autoimmune Diseases, *Blood* **132**, 3709–3709 (2018).
- 431 16. M. Murphy, S. D. Taylor, A. S. Meyer, Structured decomposition improves systems serology  
432 prediction and interpretation, *Cold Spring Harbor Laboratory* (2021),  
433 doi:10.1101/2021.01.03.425138.
- 434 17. Z. C. Tan, A. S. Meyer, A general model of multivalent binding with ligands of heterotypic  
435 subunits and multiple surface receptors, *Cold Spring Harbor Laboratory* (2021),  
436 doi:10.1101/2021.03.10.434776.
- 437 18. R. A. Robinett, N. Guan, A. Lux, M. Biburger, F. Nimmerjahn, A. S. Meyer, Dissecting  
438 FcγR Regulation through a Multivalent Binding Model., *Cell Syst* **7**, 41–48.e5 (2018).
- 439 19. A. S. Perelson, C. DeLisi, *Receptor clustering on a cell surface. I. theory of receptor cross-*  
440 *linking by ligands bearing two chemically identical functional groups* (Elsevier, 1980);  
441 <https://www.sciencedirect.com/science/article/abs/pii/0025556480900176>).
- 442 20. J. D. Stone, J. R. Cochran, L. J. Stern, T-cell activation by soluble MHC oligomers can be  
443 described by a two-parameter binding model., *Biophys J* **81**, 2547–57 (2001).
- 444 21. R. F. Pass, C. Hutto, R. Ricks, G. A. Cloud, Increased rate of cytomegalovirus infection  
445 among parents of children attending day-care centers., *N Engl J Med* **314**, 1414–8 (1986).
- 446 22. L. T. Yamamoto, H. N. Wigder, D. J. Fligner, M. Rauen, R. A. Dershewitz, Relationship of  
447 bacteremia to antipyretic therapy in febrile children., *Pediatr Emerg Care* **3**, 223–7 (1987).
- 448 23. Y. Mazor, K. F. Sachsenmeier, C. Yang, A. Hansen, J. Filderman, K. Mulgrew, H. Wu, W.  
449 F. Dall’Acqua, Enhanced tumor-targeting selectivity by modulating bispecific antibody binding  
450 affinity and format valence, *Scientific Reports* **7**, 40098 (2017).
- 451 24. Z. C. Tan, B. Orcutt-Jahns, A. S. Meyer, A quantitative view of strategies to engineer cell-  
452 selective ligand binding, *Cold Spring Harbor Laboratory* (2020),  
453 doi:10.1101/2020.11.25.398974.
- 454 25. Y. E. Antebi, J. M. Linton, H. Klumpe, B. Bintu, M. Gong, C. Su, R. McCardell, M. B.  
455 Elowitz, Combinatorial Signal Perception in the BMP Pathway, *Cell* **170**, 1184–1196.e24  
456 (2017).
- 457 26. I. Moraga, J.B. Spangler, J.L. Mendoza, M. Gakovic, T.S. Wehrman, P. Krutzik, K.C.  
458 Garcia, Synthekines are surrogate cytokine and growth factor agonists that compel signaling  
459 through non-natural receptor dimers, *eLife* (2017).
- 460 27. Á. M. Cuesta, N. Sainz-Pastor, J. Bonet, B. Oliva, L. Álvarez-Vallina, Multivalent  
461 antibodies: when design surpasses evolution, *Trends in Biotechnology* **28**, 355–362 (2010).

- 462 28. S. J. York, L. S. Arneson, W. T. Gregory, N. M. Dahms, S. Kornfeld, The Rate of  
463 Internalization of the Mannose 6-Phosphate/Insulin-like Growth Factor II Receptor Is Enhanced  
464 by Multivalent Ligand Binding, *Journal of Biological Chemistry* **274**, 1164–1171 (1999).
- 465 29. C. B. Carlson, P. Mowery, R. M. Owen, E. C. Dykhuizen, L. L. Kiessling, Selective Tumor  
466 Cell Targeting Using Low-Affinity, Multivalent Interactions, *ACS Chemical Biology* **2**, 119–127  
467 (2007).
- 468 30. L. B. Peterson, C. J. M. Bell, S. K. Howlett, M. L. Pekalski, K. Brady, H. Hinton, D. Sauter,  
469 J. A. Todd, P. Umana, O. Ast, I. Waldhauer, A. Freimoser-Grundschober, E. Moessner, C. Klein,  
470 R. J. Hosse, L. S. Wicker, A long-lived IL-2 mutein that selectively activates and expands  
471 regulatory T cells as a therapy for autoimmune disease, *Journal of Autoimmunity* **95**, 1–14  
472 (2018).
- 473 31. C. Ye, D. Brand, S. G. Zheng, Targeting IL-2: an unexpected effect in treating  
474 immunological diseases, *Signal Transduction and Targeted Therapy* **3**, 2 (2018).
- 475 32. J. P. Siegel, R. K. Puri, Interleukin-2 toxicity., *Journal of Clinical Oncology* **9**, 694–704  
476 (1991).
- 477 33. A. Carr, S. Emery, A. Lloyd, J. Hoy, R. Garsia, M. French, G. Stewart, G. Fyfe, D. A.  
478 Cooper, Australian IL-2 Study Group, Outpatient Continuous Intravenous Interleukin-2 or  
479 Subcutaneous, Polyethylene Glycol-Modified Interleukin-2 in Human Immunodeficiency Virus-  
480 Infected Patients: A Randomized, Controlled, Multicenter Study, *The Journal of Infectious*  
481 *Diseases* **178**, 992–999 (1998).
- 482 34. D.-A. Silva, S. Yu, U. Y. Ulge, J. B. Spangler, K. M. Jude, C. Labão-Almeida, L. R. Ali, A.  
483 Quijano-Rubio, M. Ruterbusch, I. Leung, T. Biary, S. J. Crowley, E. Marcos, C. D. Walkey, B.  
484 D. Weitzner, F. Pardo-Avila, J. Castellanos, L. Carter, L. Stewart, S. R. Riddell, M. Pepper, G. J.  
485 L. Bernardes, M. Dougan, K. C. Garcia, D. Baker, De novo design of potent and selective  
486 mimics of IL-2 and IL-15, *Nature* **565**, 186–191 (2019).
- 487 35. A. E. Kelly-Welch, Interleukin-4 and Interleukin-13 Signaling Connections Maps, *Science*  
488 **300**, 1527–1528 (2003).
- 489 36. G. A. Efimov, A. A. Kruglov, Z. V. Khlopchatnikova, F. N. Rozov, V. V. Mokhonov, S.  
490 Rose-John, J. Scheller, S. Gordon, M. Stacey, M. S. Drutskaya, S. V. Tillib, S. A. Nedospasov,  
491 Cell-type–restricted anti-cytokine therapy: TNF inhibition from one pathogenic source,  
492 *Proceedings of the National Academy of Sciences* **113**, 3006–3011 (2016).
- 493 37. J. B. Spangler, I. Moraga, J. L. Mendoza, K. C. Garcia, Insights into Cytokine–Receptor  
494 Interactions from Cytokine Engineering, *Annual Review of Immunology* **33**, 139–167 (2015).
- 495 38. J. S. Peraino, H. Zhang, P. V. Rajasekera, M. Wei, J. C. Madsen, D. H. Sachs, C. A. Huang,  
496 Z. Wang, Diphtheria toxin-based bivalent human IL-2 fusion toxin with improved efficacy for  
497 targeting human CD25+ cells, *Journal of Immunological Methods* **405**, 57–66 (2014).



- 498 39. Z. Wang, Q. Zheng, H. Zhang, R. T. Bronson, J. C. Madsen, D. H. Sachs, C. A. Huang, Z.  
499 Wang, Ontak-like human IL-2 fusion toxin, *Journal of Immunological Methods* **448**, 51–58  
500 (2017).
- 501 40. Z. Qi, Y. Qiu, Z. Wang, H. Zhang, L. Lu, Y. Liu, D. Mathes, E. A. Pomfret, D. Gao, S. Lu,  
502 Z. Wang, A novel diphtheria toxin-based bivalent human EGF fusion toxin for treatment of head  
503 and neck squamous cell carcinoma, *Molecular Oncology* **15**, 1054–1068 (2021).
- 504 41. J. Kossaifi, Y. Panagakis, A. Anandkumar, M. Pantic, *TensorLy: Tensor Learning in Python*  
505 (arXiv, 2018; <https://arxiv.org/abs/1610.09555>).
- 506 42. A. M. Farhat, A. C. Weiner, C. Posner, Z. S. Kim, B. Orcutt-Jahns, S. M. Carlson, A. S.  
507 Meyer, Modeling cell-specific dynamics and regulation of the common gamma chain cytokines,  
508 *Cell Reports* **35**, 109044 (2021).
- 509 43. T. Ishino, M. Wang, L. Mosyak, A. Tam, W. Duan, K. Svenson, A. Joyce, D. M. O’Hara, L.  
510 Lin, W. S. Somers, R. Kriz, Engineering a Monomeric Fc Domain Modality by N-Glycosylation  
511 for the Half-life Extension of Biotherapeutics, *Journal of Biological Chemistry* **288**, 16529–  
512 16537 (2013).

513 **Acknowledgements:**

514 **Funding:** This work was supported by a research agreement with Visterra, Inc.

515 **Author contributions statement:** A.S.M. and S.M.C. conceived of the study. C.P. and S.M.C.  
516 performed the PBMC experiments and engineered the IL-2 fusion proteins. A.S.M, B.O.J.,  
517 E.M.S., and P.C.E. performed the computational analysis. All authors helped to design  
518 experiments and/or analyze the data. All authors contributed to writing the paper.

519 **Competing interests:** S.M.C. and C.P. are employees of Visterra Inc. A.S.M. has filed an  
520 invention disclosure on the use of multivalent cytokines to enhance cell type selective responses.

521 **Data Sharing Plan:** All analysis was implemented in Python v3.9 and can be found at  
522 <https://github.com/meyer-lab/gc-valent>, release 1.0, along with all experimental data.

523 **Figures**

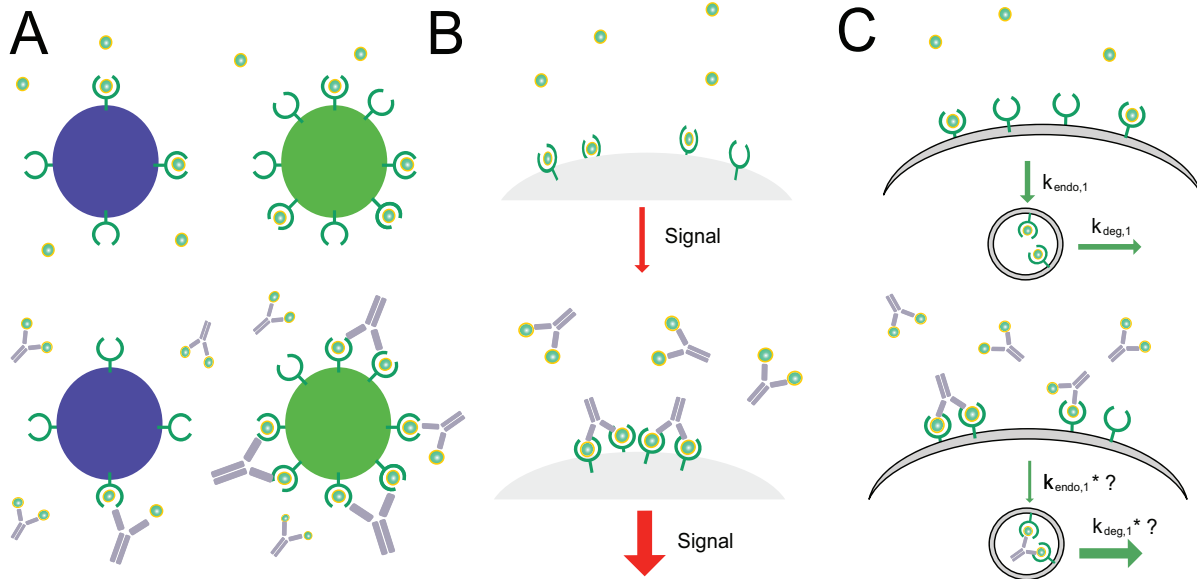

524

525 **Fig. 1. Possible effects of bivalent Fc-cytokine formats.** (A) Multivalent ligands are known to  
526 bind to surface receptors with altered functional affinities that vary as a function of the number  
527 of receptors displayed by the cell. (B) Cartoon illustrating how ligand valency may alter signal  
528 transduction dynamics. Multivalent binding has been shown to be critical in some signaling  
529 pathways via the local aggregation of active signaling complexes. (C) Multivalently bound  
530 receptors have been shown to be degraded intracellularly at a rate differing from monovalently  
531 bound receptors and have also been shown to possess altered *in vivo* pharmacokinetics.

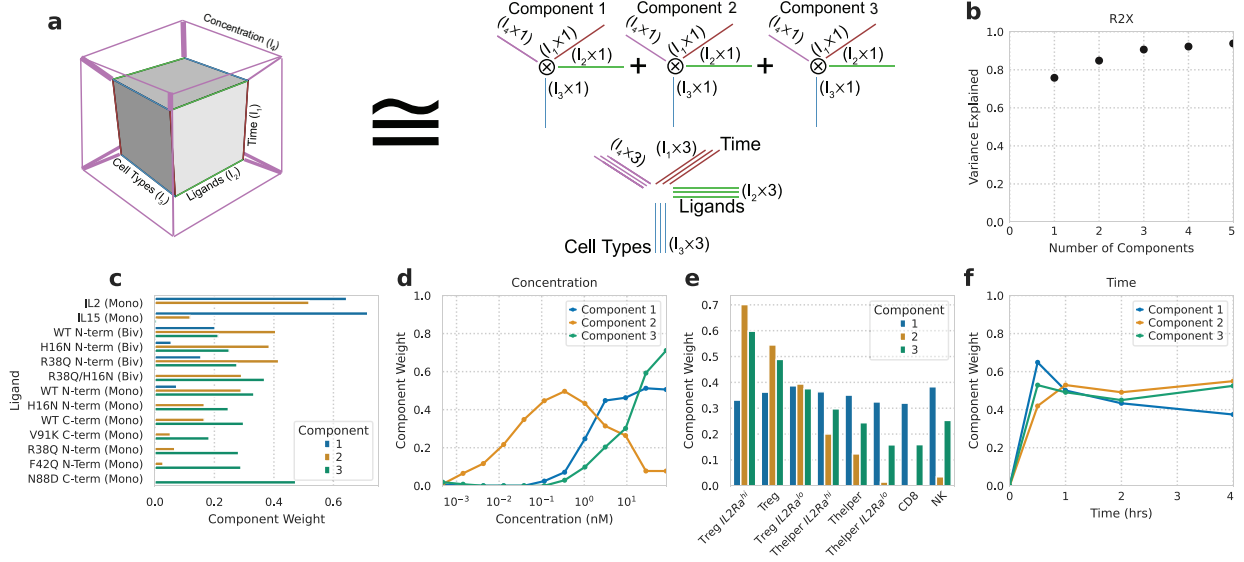

532

533 **Fig. 2. pSTAT5 response varies in a cell type- and treatment-specific manner. (A)** Schematic  
 534 representation of non-negative canonical polyadic (CP) decomposition. Experimental pSTAT5  
 535 measurements are arranged in a tensor according to the duration of treatment, ligand used,  
 536 cytokine concentration, and cell type. CP decomposition then helps to visualize this space. **(B)**  
 537 Percent variance reconstructed (R2X) versus the number of components used. **(C)** Component  
 538 values for each IL-2 form. **(D)** Component values representing the effect of IL-2 concentration.  
 539 **(E)** Component values representing cell type specificity. **(F)** Component values for the effect of  
 540 treatment duration.

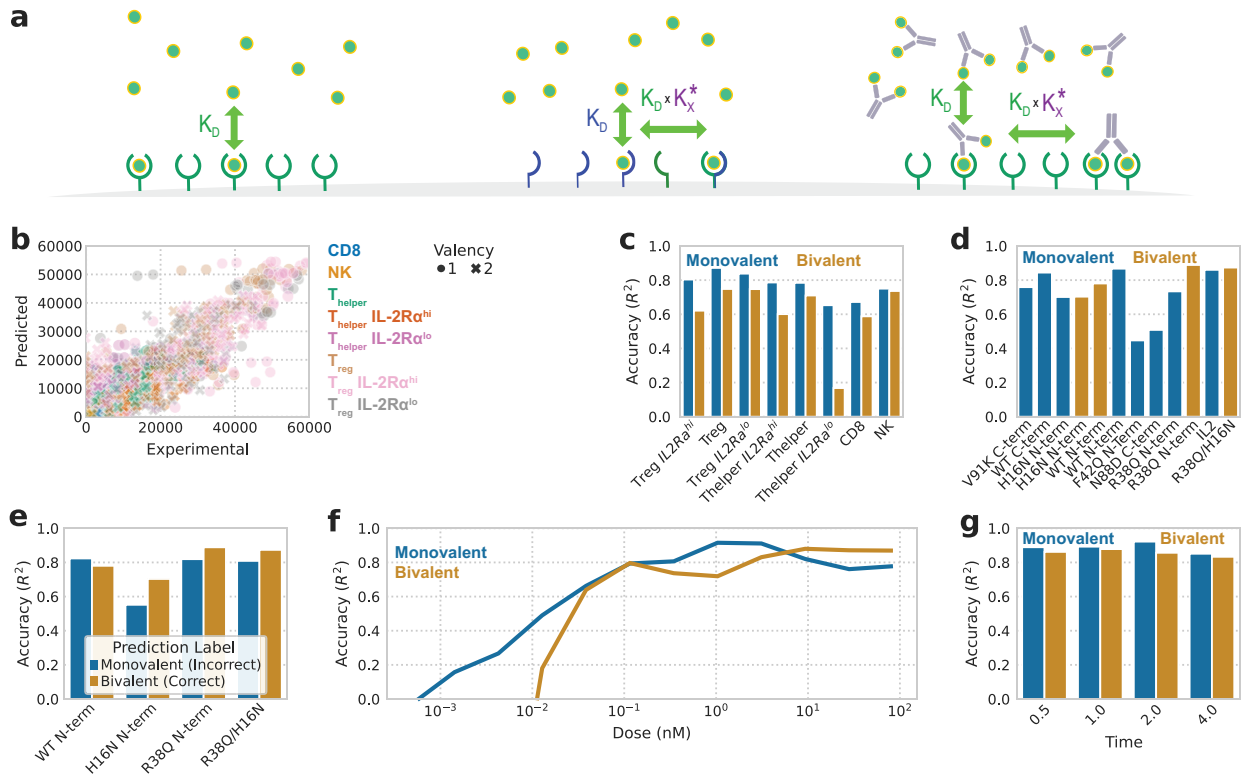

541

542 **Fig. 3. Responses are predicted by a simple multivalent binding model.** All accuracies are  
 543 calculated as a Pearson's correlation  $R^2$  score for experimental cytokine responses at the 30  
 544 minute and one hour time points. (A) A simplified cartoon of the model. Initial association of  
 545 multivalent ligands proceeds according to monovalent affinity, and subsequent binding events  
 546 proceed with that affinity scaled by the  $K_x^*$  parameter. (B) Experimentally measured vs. predicted  
 547 pSTAT5 responses for all cell types, ligands, and concentrations. Each point represents a single  
 548 experimental measurement ( $N=1$ ). (C,D) Model's accuracy subset by cell type (C) and ligand  
 549 (D) for all mono- and bivalent IL-2 mutants. (E) Model's accuracy when predicting the  
 550 responses of all cell types to bivalent ligands either correctly as dimers, or as IL-2 monomers.  
 551 (F,G) Model's accuracy subset by concentration (F) for all ligands and time (G) for all ligands,  
 552 concentrations, and cell types.

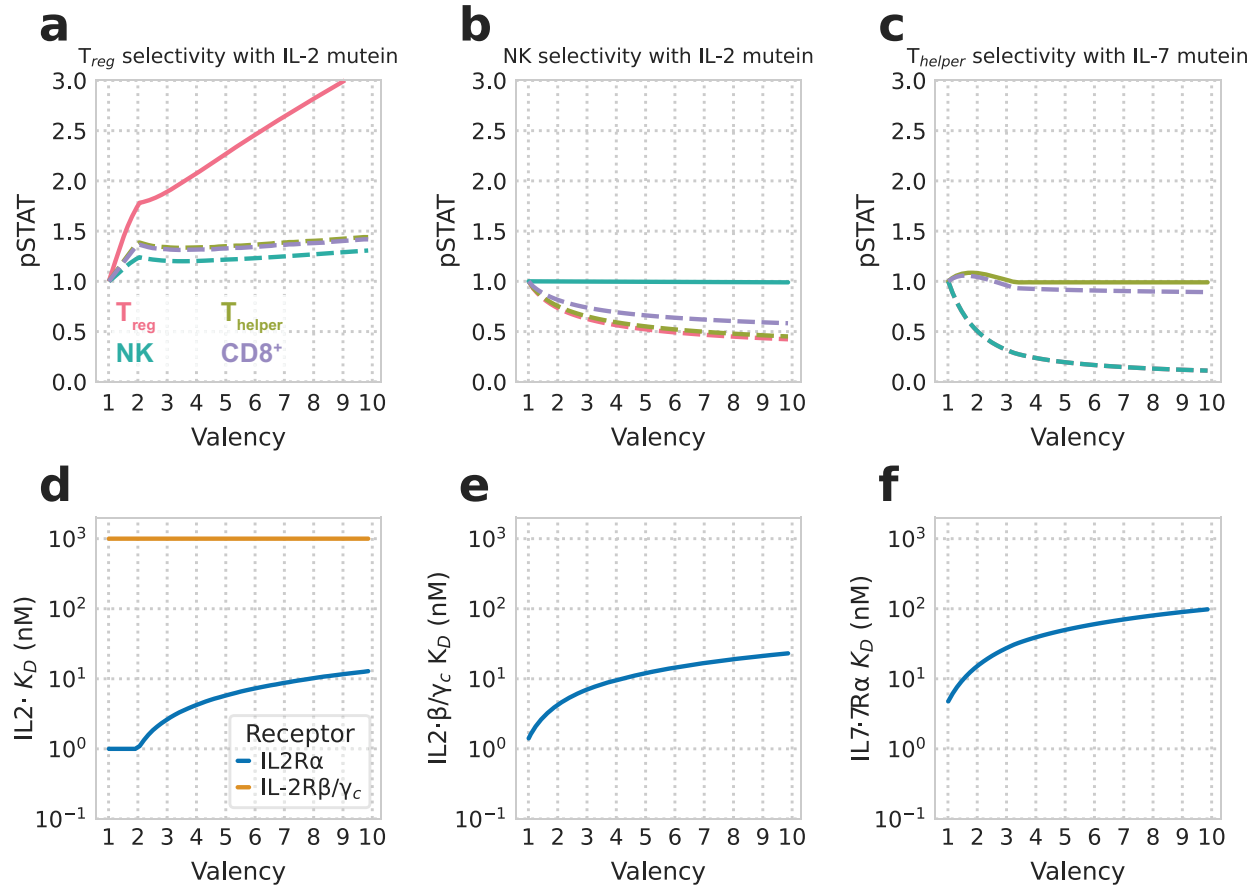

553

554 **Fig. 4. Multivalency with coordinate affinity adjustments can enhance selectivity.** Affinities  
555 were allowed to vary across K<sub>D</sub>s of 10 pM–1 μM while K<sub>x</sub><sup>\*</sup> was fixed at its fitting optimum. All  
556 optimizations were performed using a concentration of 1 nM. Selectivity was calculated as the  
557 ratio of predicted pSTAT5 in target cells to the mean pSTAT5 predicted in off-target cells.  
558 (A,C,E) Signaling response of T<sub>reg</sub>, NK cells, and T<sub>helper</sub> cells predicted for ligand of optimal  
559 selectivity at different valencies. Response predictions were normalized to each population's  
560 response for the monovalent case. Selectivity for T<sub>reg</sub>s and NK cells were derived from IL-2  
561 muteins, and selectivity for T<sub>helper</sub>s was calculated using IL-7 muteins. (B,D,F) Optimal receptor-  
562 ligand dissociation constants for each ligand optimized for selectivity. Mutein affinity for IL-2Rα  
563 and IL-2Rβ/γ<sub>c</sub> was allowed to vary for IL-2 muteins, and affinity for IL-7Rα was allowed to vary  
564 for IL-7 muteins.
